# Supplementary material for: Integrated Analysis of Necroptosis-Related Genes for Prognosis, Immune Microenvironment Infiltration, and Drug Sensitivity in Colon Cancer
Source: PubMed Central journal article supplement (PMC9036446; doi:10.3389/fmed.2022.845271), 2022-04-11
Supplement: Data_Sheet_1.pdf [file Data_Sheet_1.pdf]

## Supplementary Figures

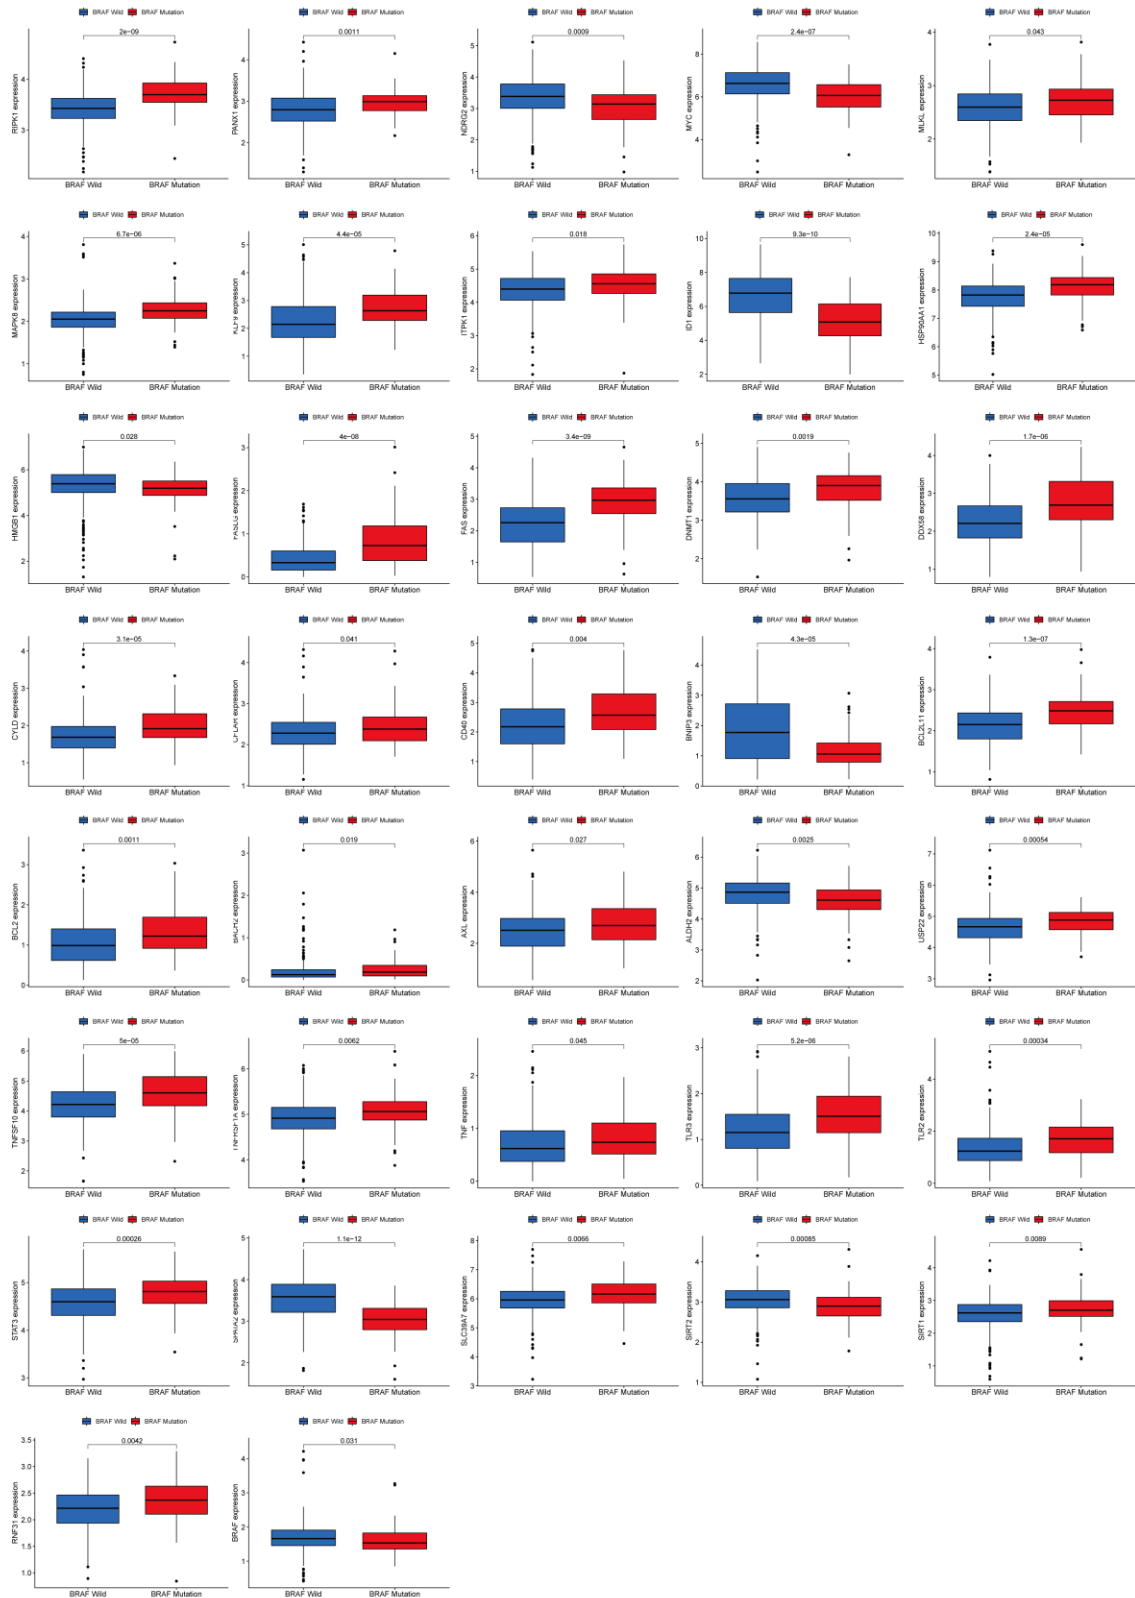

**Figure S1.** The relationship between BRAF mutation and expression level of

necroptosis-related genes in colon cancer.

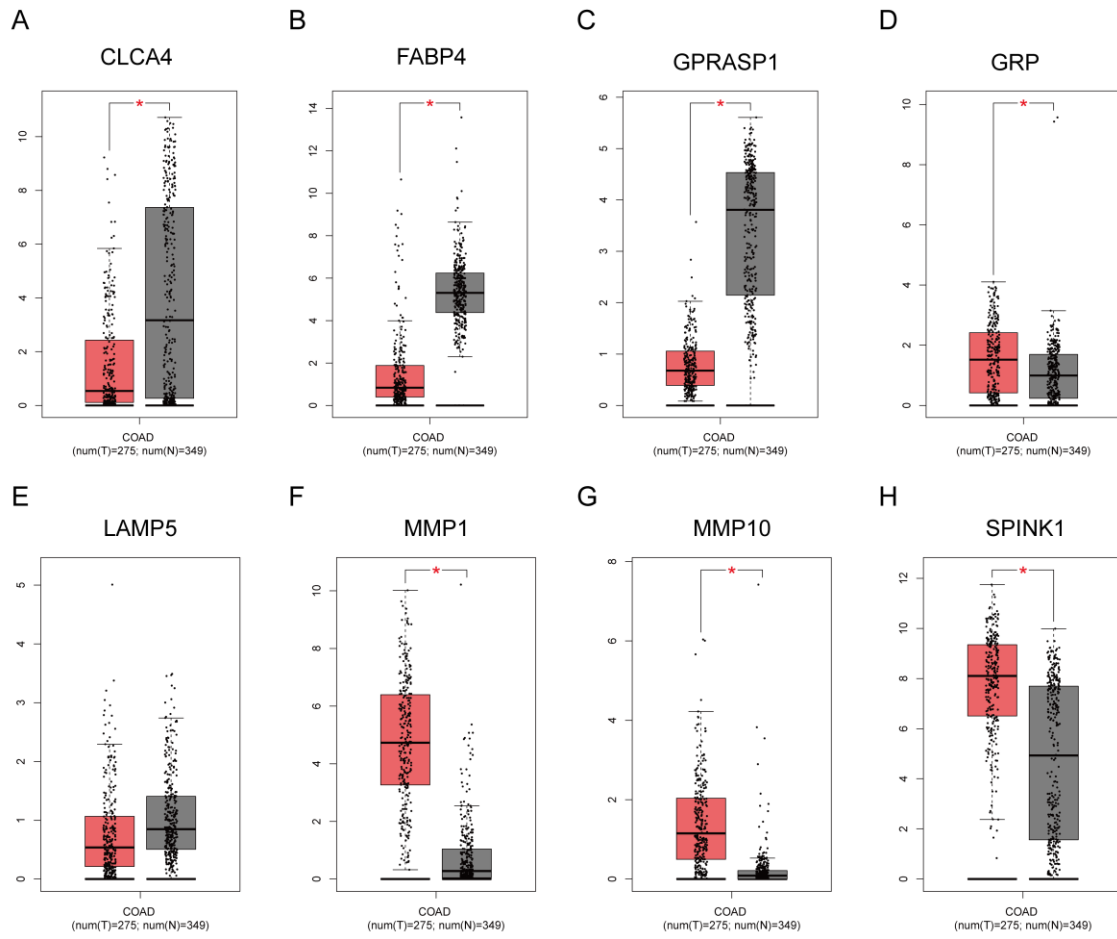

**Figure S2. (A-H)** Differential expression of the 8 model gene in the Gene Expression Profiling Interactive Analysis (GEPIA) online databases .

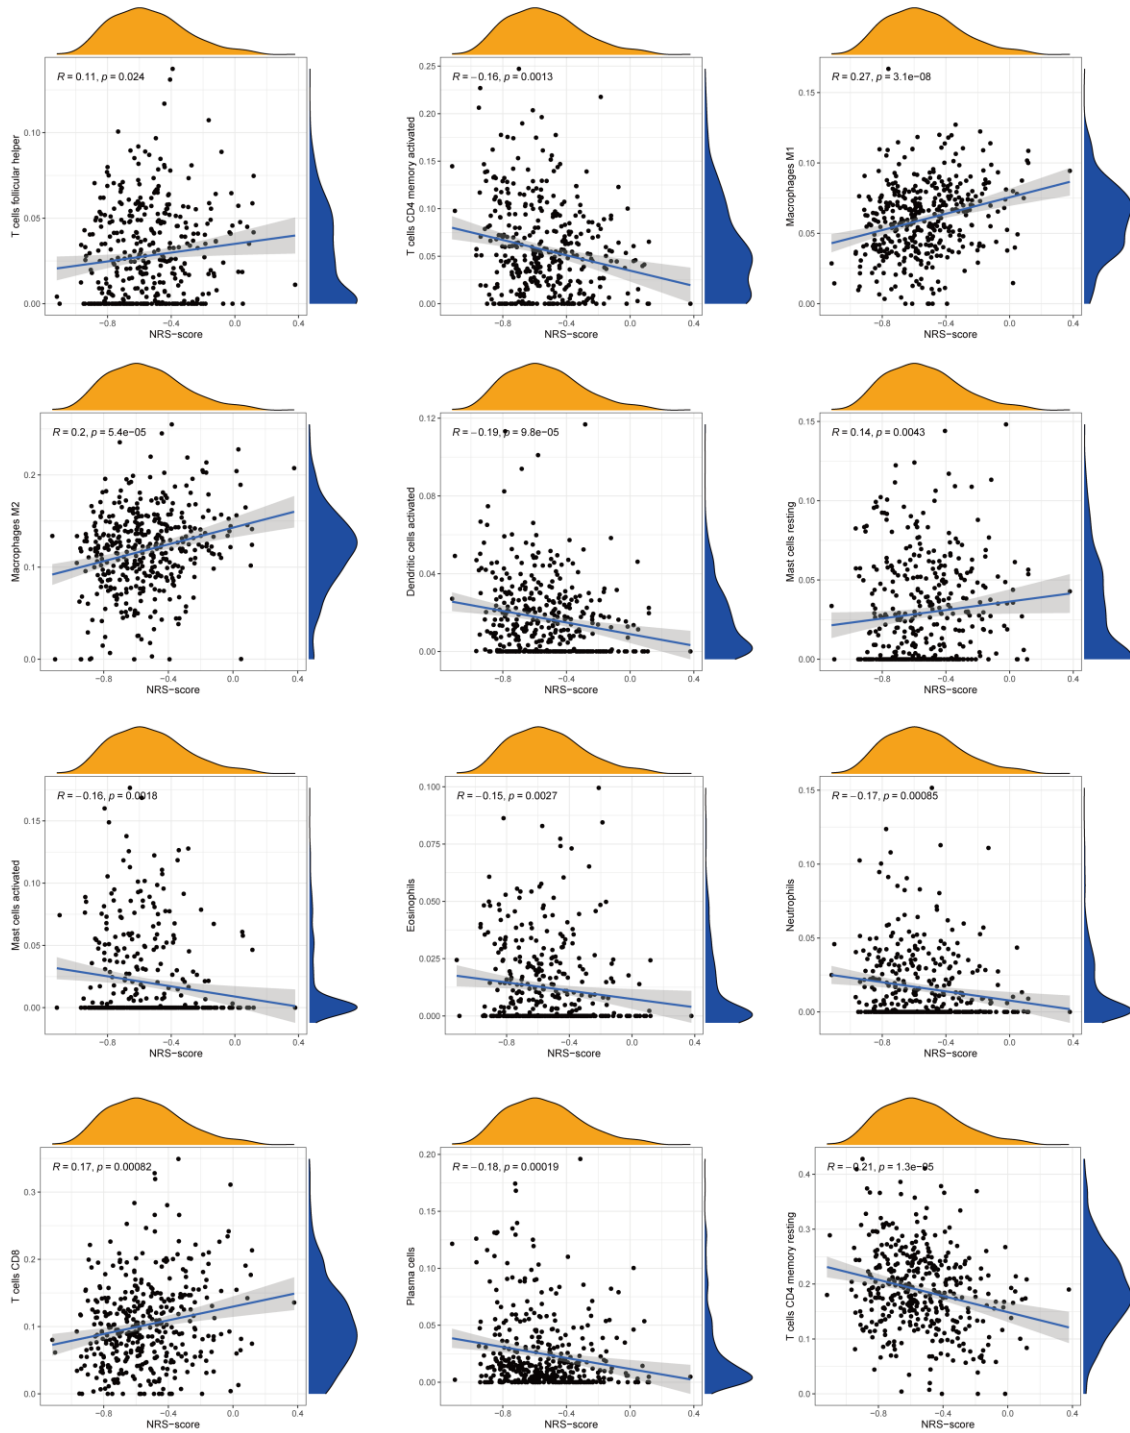

**Figure S3.**Correlation test between immune cells and NRS-score, only TICs with significant correlation are plotted. The blue line in the plot is the fitted linear model, and the shading around it represents the 95% confidence interval.
